# Supplementary material
Source: Royal Society of Chemistry journal article supplement (doi:10.1039/d5cp04721h)
Supplement: d5cp04721h3.pdf [file d5cp04721h3.pdf]

# Multi-Structural Kinetics Study on H-atom Abstraction from Fuel Molecules by $\dot{\text{N}}\text{H}_2$ Radicals with Anharmonicity, Recrossing and Tunneling Effects

Jingwu Sun<sup>a, b, 1</sup>, Zhaolin Fu<sup>c, 1</sup>, Junyue Zhang<sup>a</sup>, Zhiping Tao<sup>c</sup>, Mengyuan Wang<sup>a\*</sup>, Chong-Wen Zhou<sup>a, d\*</sup>

<sup>a</sup> School of Energy and Power Engineering, Beihang University, Beijing 100191, PR China

<sup>b</sup> National Institute of Clean-and-Low-carbon Energy, Beijing, 102211, China.

<sup>c</sup> Research Institute of Petroleum Processing, Sinopec, 18 Xueyuan Road, Haidian District, Beijing 100083, PR China

<sup>d</sup> Combustion Chemistry Centre, School of Biological and Chemical Sciences, MaREI, Ryan Institute, University of Galway, aaway H91TK33, Ireland

<sup>1</sup> These authors contributed equally.

Email: [mengyuanwang@buaa.edu.cn](mailto:mengyuanwang@buaa.edu.cn); [chongwen.zhou@universityofgalway.ie](mailto:chongwen.zhou@universityofgalway.ie)

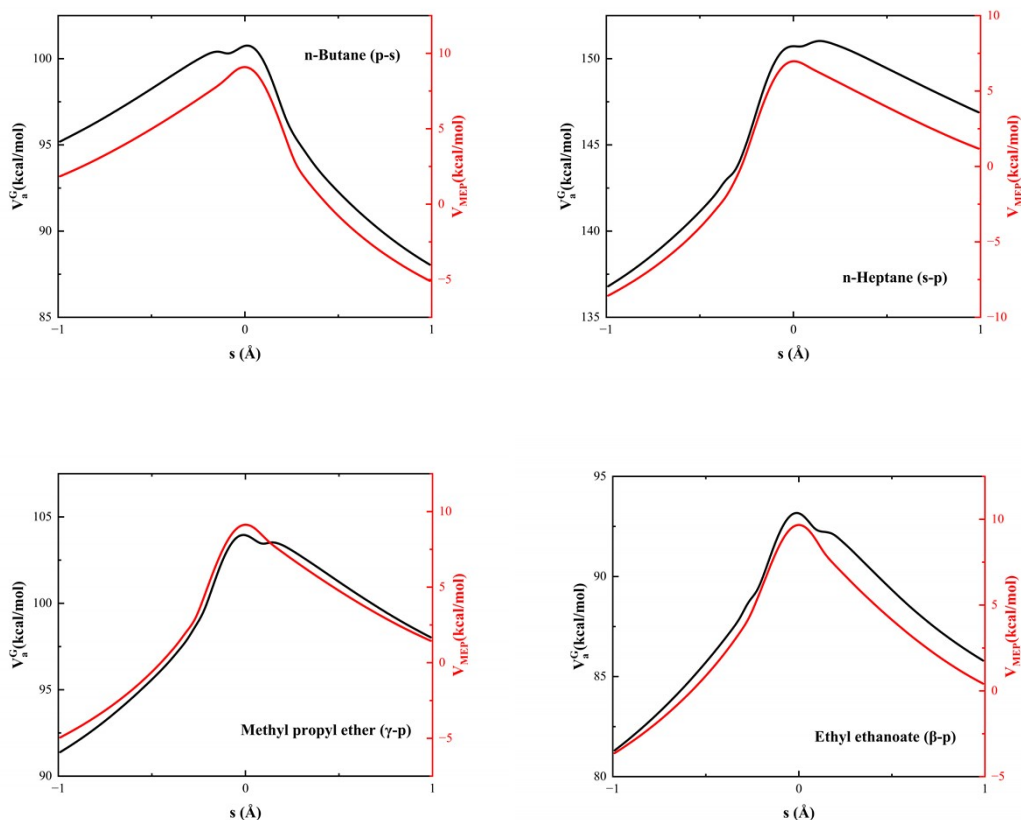

Fig S1: The potential energy ( $V_{\text{MEP}}$ ) and vibrational adiabatic ground energy ( $V_a^G$ ) with respect to the reaction coordinate ( $s$ ).

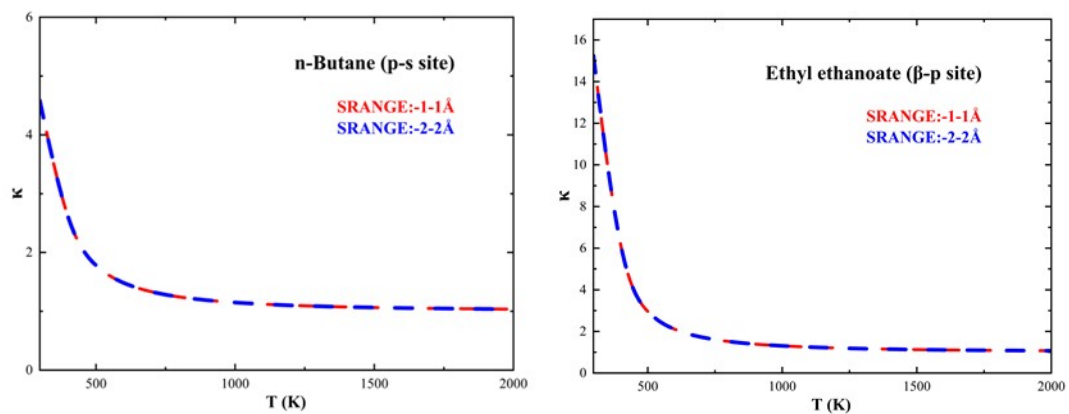

Fig S2: Multi-dimensional SCT tunneling transmission coefficients along different reaction coordinate range for MEP calculation.

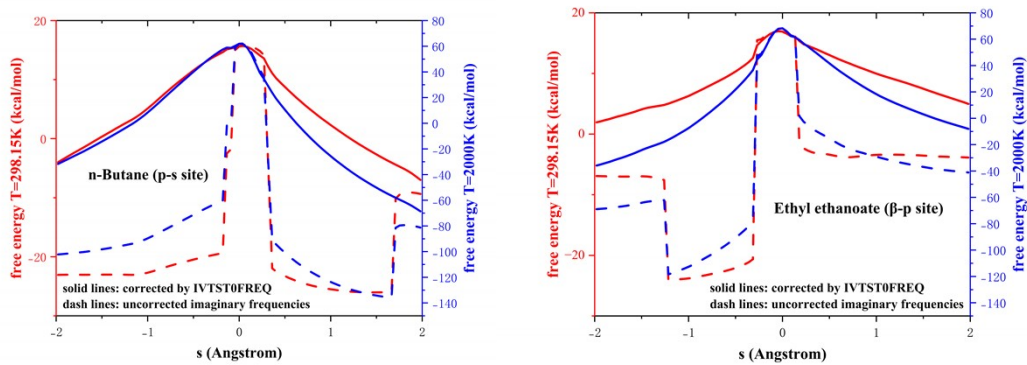

(a)

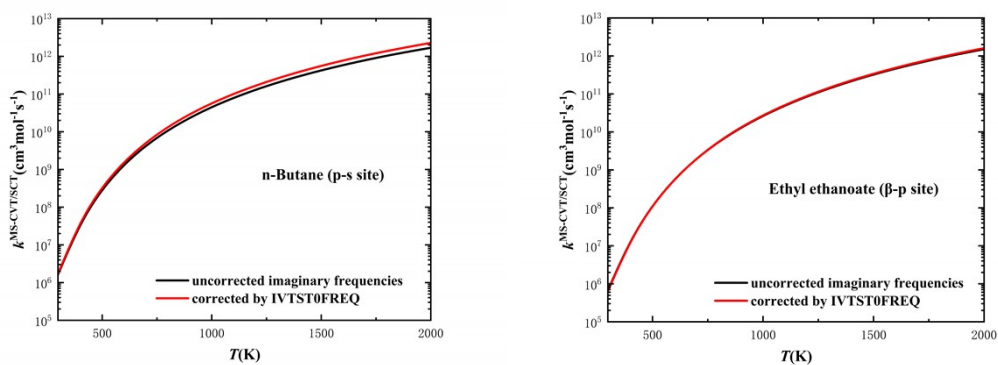

(b)

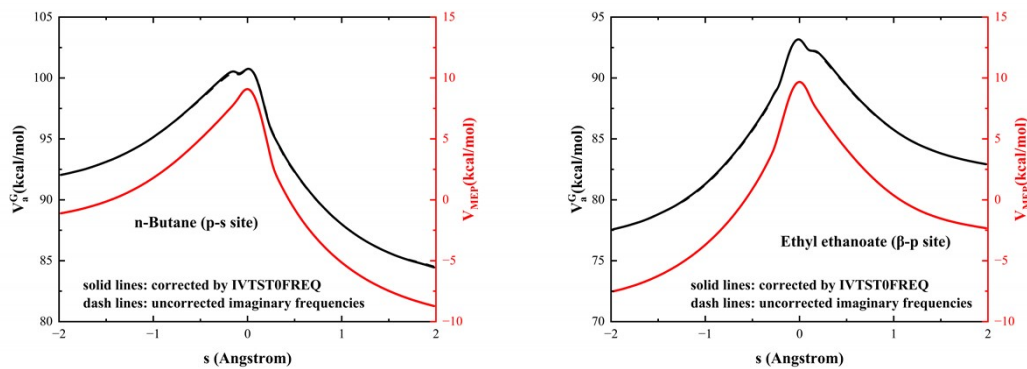

(c)

Fig S3: Comparison of (a) free energy profiles, (b) rate constants and (c) vibrationally adiabatic potentials before and after transverse imaginary frequency correction.

Table S1  
Comparison of thermochemical data for different species calculated in this work and from database. <sup>1</sup>1-D hindered treatment, <sup>2</sup>MS-T method, <sup>a</sup>ATcT database, <sup>b</sup>Burcat's database.

| Species                                          | $\Delta_f H_{f,298}^{\circ}$ (kJ mol <sup>-1</sup> ) |                                                                                                                                                                                 | $S_{298}^{\circ}$ (J mol <sup>-1</sup> K <sup>-1</sup> ) |                                                       |
|--------------------------------------------------|------------------------------------------------------|---------------------------------------------------------------------------------------------------------------------------------------------------------------------------------|----------------------------------------------------------|-------------------------------------------------------|
|                                                  | this work                                            | Literature                                                                                                                                                                      | this work                                                | Literature                                            |
| n-Butane<br>C <sub>4</sub> H <sub>10</sub> _1    | -126.91 <sup>1</sup><br>-126.46 <sup>2</sup>         | -125.60±0.67 <sup>53</sup><br>-127.10±0.67 <sup>54</sup><br>-125.53±0.19 <sup>a 55</sup><br>-125.79±0.38 <sup>b 50</sup>                                                        | +313.43 <sup>1</sup><br>+312.19 <sup>2</sup>             | +309.88 <sup>b 50</sup>                               |
| iso-Butane<br>C <sub>4</sub> H <sub>10</sub> _2  | -135.97 <sup>1</sup><br>-134.65 <sup>2</sup>         | -134.20±0.63 <sup>53</sup><br>-135.60±0.54 <sup>54</sup><br>-134.47±0.27 <sup>a 55</sup><br>-134.99±0.40 <sup>b 50</sup>                                                        | +296.67 <sup>1</sup><br>+296.20 <sup>2</sup>             | +295.49 <sup>b 50</sup>                               |
| n-Pentane<br>C <sub>5</sub> H <sub>12</sub> _1   | -147.31 <sup>1</sup><br>-147.36 <sup>2</sup>         | -146.80±0.59 <sup>56</sup><br>-147.10±1.00 <sup>57</sup><br>-146.40±0.67 <sup>54</sup><br>-146.04±0.29 <sup>a 55</sup><br>-152.31±8 <sup>b 50</sup>                             | +355.59 <sup>1</sup><br>+350.78 <sup>2</sup>             | +349.82±0.84 <sup>58</sup><br>+348.29 <sup>b 50</sup> |
| iso-Pentane<br>C <sub>5</sub> H <sub>12</sub> _2 | -154.69 <sup>1</sup><br>-153.21 <sup>2</sup>         | -153.70±0.59 <sup>56</sup><br>-154.10±0.96 <sup>57</sup><br>-154.50±0.84 <sup>54</sup><br>-152.95±0.39 <sup>a 55</sup><br>-153.70 <sup>b 50</sup>                               | +347.56 <sup>1</sup><br>+345.48 <sup>2</sup>             | +343.74 <sup>b 50</sup>                               |
| Neopentane<br>C <sub>5</sub> H <sub>12</sub> _3  | -171.04 <sup>1</sup><br>-167.19 <sup>2</sup>         | -167.90±0.63 <sup>56</sup><br>-168.50±1.00 <sup>57</sup><br>-166.00±1.00 <sup>54</sup><br>-167.12±0.38 <sup>a 55</sup><br>-168.26±8 <sup>b 50</sup>                             | +309.75 <sup>1</sup><br>+308.92 <sup>2</sup>             | +309.57 <sup>b 50</sup>                               |
| n-Heptane<br>C <sub>7</sub> H <sub>16</sub>      | -189.63 <sup>1</sup><br>-188.77 <sup>2</sup>         | -187.53±0.48 <sup>59</sup><br>-187.78±0.74 <sup>60</sup><br>-187.80±0.79 <sup>61</sup><br>-189.30 <sup>62</sup><br>-187.26±0.44 <sup>a 55</sup><br>-187.78±0.74 <sup>b 50</sup> | +432.88 <sup>1</sup><br>+428.42 <sup>2</sup>             | +428.10 <sup>60</sup><br>+428.10 <sup>b 50</sup>      |
| iso-Octane<br>C <sub>8</sub> H <sub>18</sub>     | -229.06 <sup>1</sup><br>-226.47 <sup>2</sup>         | -223.70±1.50 <sup>59</sup><br>-224.01±1.50 <sup>60</sup><br>-224.10±1.30 <sup>61</sup><br>-223.50±1.50 <sup>a 55</sup><br>-224.01±1.50 <sup>b 50</sup>                          | +432.35 <sup>1</sup><br>+422.78 <sup>2</sup>             | +423.09 <sup>60</sup><br>+423.09 <sup>b 50</sup>      |
| n-Butanol                                        | -276.51 <sup>1</sup><br>-275.40 <sup>2</sup>         | -277.00±5.00 <sup>63</sup><br>-274.74±0.24 <sup>a 55</sup><br>-275.98±8.00 <sup>b 50</sup>                                                                                      | +365.48 <sup>1</sup><br>+362.43 <sup>2</sup>             | +361.98 <sup>64</sup><br>+361.70 <sup>b 50</sup>      |
| Ethyl ethanoate                                  | -446.32 <sup>2</sup>                                 | -446.90 <sup>65</sup><br>-444.80±0.40 <sup>66</sup><br>-443.80 <sup>67</sup><br>-445.43±0.84 <sup>68</sup><br>-448.55±8.00 <sup>b 50</sup>                                      | +358.77 <sup>2</sup>                                     | +362.75 <sup>69</sup><br>+377.41 <sup>b 50</sup>      |
| Methyl propyl ether                              | -237.42 <sup>2</sup>                                 | -238.02±0.85 <sup>70</sup><br>-237.70±1.10 <sup>71</sup>                                                                                                                        | +350.93 <sup>2</sup>                                     | 352.00 <sup>72</sup>                                  |

Tabel S2

Comparison of  $C_p$  J mol<sup>-1</sup> K<sup>-1</sup> for different species calculated in this work and from the literature.

| Species                                                                                 | This study                                 |                  |                  |                  |                  |                   |                  | Literature                                                             |        |        |        |        |        |        |
|-----------------------------------------------------------------------------------------|--------------------------------------------|------------------|------------------|------------------|------------------|-------------------|------------------|------------------------------------------------------------------------|--------|--------|--------|--------|--------|--------|
|                                                                                         | 300                                        | 400              | 500              | 600              | 800              | 1000              | 1500             | 300                                                                    | 400    | 500    | 600    | 800    | 1000   | 1500   |
| n-Butane<br>C <sub>4</sub> H <sub>10</sub> 1                                            | 96.68 <sup>1</sup><br>97.00 <sup>2</sup>   | 121.29<br>122.07 | 145.12<br>145.64 | 166.38<br>166.17 | 198.87<br>199.15 | 224.08<br>224.162 | 263.65<br>263.80 | 98.95 <sup>76</sup><br>98.65 <sup>b 50</sup>                           | 124.77 | 148.66 | 169.28 | 202.38 | 227.36 | 266.40 |
| iso-Butane<br>C <sub>4</sub> H <sub>10</sub> 2                                          | 97.75 <sup>1</sup><br>97.90 <sup>2</sup>   | 123.60<br>124.38 | 147.73<br>148.40 | 168.84<br>168.87 | 200.83<br>201.26 | 225.50<br>225.69  | 264.33<br>264.53 | 97.15 <sup>76</sup><br>96.64 <sup>b 50</sup>                           | 124.43 | 149.24 | 170.37 | 203.64 | 228.45 | 267.02 |
| n-Pentane<br>C <sub>5</sub> H <sub>12</sub> 1                                           | 119.46 <sup>1</sup><br>119.10 <sup>2</sup> | 149.64<br>150.71 | 178.99<br>180.14 | 205.13<br>205.58 | 244.77<br>246.14 | 275.39<br>276.68  | 323.12<br>324.62 | 120.62 <sup>77</sup><br>112.15 <sup>b 50</sup>                         | 152.55 | 182.59 | 208.78 | 250.62 | 281.58 | 330.54 |
| iso-Pentane<br>C <sub>5</sub> H <sub>12</sub> 2                                         | 120.40 <sup>1</sup><br>117.00 <sup>2</sup> | 151.55<br>149.90 | 180.90<br>178.54 | 206.73<br>203.95 | 246.11<br>244.30 | 276.32<br>274.68  | 323.58<br>322.67 | 119.50 <sup>77</sup><br>118.87 <sup>b 50</sup>                         | 152.88 | 183.26 | 210.04 | 253.13 | 286.19 | 338.90 |
| Neopentane<br>C <sub>5</sub> H <sub>12</sub> 3                                          | 122.85 <sup>1</sup><br>122.55 <sup>2</sup> | 155.91<br>156.20 | 186.00<br>186.36 | 211.85<br>211.74 | 250.34<br>251.10 | 279.56<br>280.19  | 325.25<br>325.85 | 121.55 <sup>77</sup><br>121.91 <sup>b 50</sup>                         | 155.98 | 186.98 | 214.64 | 261.08 | 297.90 | 359.82 |
| n-Heptane<br>C <sub>7</sub> H <sub>16</sub>                                             | 157.15 <sup>1</sup><br>163.94 <sup>2</sup> | 198.34<br>207.61 | 239.37<br>248.32 | 276.08<br>283.44 | 330.78<br>339.13 | 372.78<br>380.71  | 437.36<br>445.41 | 165.98 <sup>77</sup><br>165.18 <sup>60</sup><br>165.18 <sup>b 50</sup> | 210.66 | 252.09 | 287.44 | 342.25 | 381.58 | 443.50 |
| iso-Octane<br>C <sub>8</sub> H <sub>18</sub>                                            | 188.44 <sup>1</sup><br>189.13 <sup>2</sup> | 239.74<br>241.29 | 286.99<br>288.42 | 327.85<br>328.33 | 388.76<br>390.39 | 434.55<br>436.01  | 504.91<br>506.51 | 189.45 <sup>77</sup><br>188.41 <sup>60</sup><br>188.41 <sup>b 50</sup> | 244.60 | 293.42 | 335.56 | 403.34 | 454.80 | 539.74 |
| Butanol<br>C <sub>4</sub> H <sub>9</sub> OH                                             | 110.79 <sup>1</sup><br>111.16 <sup>2</sup> | 136.49<br>137.62 | 161.63<br>162.56 | 183.99<br>184.13 | 217.49<br>218.25 | 243.09<br>243.70  | 283.01<br>283.73 | 108.58 <sup>63</sup><br>108.03 <sup>b 50</sup>                         | 138.16 | 164.42 | 186.38 | 220.56 | 245.93 | 285.54 |
| Ethyl ethanoate<br>CH <sub>3</sub> COOCH <sub>2</sub> CH <sub>3</sub>                   | 109.80 <sup>2</sup>                        | 136.25           | 160.63           | 181.69           | 214.90           | 239.08            | 274.66           | 113.97 <sup>69</sup><br>107.79 <sup>b 50</sup>                         | 137.40 | 161.92 | 182.63 | 213.43 | 234.51 |        |
| Methyl propyl ether<br>CH <sub>3</sub> OCH <sub>2</sub> CH <sub>2</sub> CH <sub>3</sub> | 113.39 <sup>2</sup>                        | 138.40           | 162.37           | 183.61           | 218.07           | 244.18            | 285.13           |                                                                        |        |        |        |        |        |        |

Table S3

Modified Arrhenius expressions for rate constants ( $s^{-1}$ ) with temperature range from 298.15 K to 2000 K

|                     | HAA site     | $A(s^{-1})$ | $n$  | $E_a(\text{cal mol}^{-1})$ |
|---------------------|--------------|-------------|------|----------------------------|
| <i>n</i> -butane    | p-s          | 42.02       | 3.39 | 5183.99                    |
|                     | s-ps         | 137.17      | 3.32 | 3884.01                    |
| <i>iso</i> -butane  | p-t          | 24.77       | 3.48 | 4939.07                    |
|                     | t-3p         | 1410.89     | 2.90 | 3590.20                    |
| <i>n</i> -petane    | p-s          | 7.29        | 3.64 | 4865.81                    |
|                     | s-ps         | 65.90       | 3.36 | 3765.15                    |
|                     | s-2s         | 83.28       | 3.21 | 3609.53                    |
| <i>iso</i> -petane  | p-s          | 0.58        | 3.94 | 4819.77                    |
|                     | p-t          | 0.61        | 4.05 | 4611.56                    |
|                     | s-pt         | 5.70        | 3.69 | 3691.87                    |
|                     | t-s2p        | 87.02       | 3.23 | 2721.80                    |
| <i>n</i> -heptane   | s-ps         | 32.93       | 3.49 | 3822.13                    |
| <i>iso</i> -octane  | p-q          | 0.66        | 4.05 | 4233.23                    |
| butanol             | $\alpha$ -s  | 1.24        | 3.77 | 1387.95                    |
|                     | $\beta$ -s   | 0.15        | 4.17 | 3667.91                    |
|                     | $\gamma$ -s  | 3.77        | 3.87 | 5638.41                    |
|                     | oh           | 0.03        | 4.16 | 1705.76                    |
| methyl propyl ether | $\alpha$ -p  | 37.13       | 3.48 | 3116.27                    |
|                     | $\alpha$ -s  | 6.49        | 3.57 | 1661.37                    |
|                     | $\beta$ -s   | 0.20        | 4.07 | 2936.90                    |
|                     | $\gamma$ -p  | 0.40        | 3.96 | 5948.79                    |
| ethyl ethanoate     | $\alpha'$ -p | 0.38        | 3.95 | 4330.68                    |
|                     | $\alpha$ -s  | 1.36        | 3.80 | 2927.46                    |
|                     | $\beta$ -p   | 0.03        | 4.32 | 4560.22                    |
